# Supplementary material for: PEPCK-M recoups tumor cell anabolic potential in a PKC-ζ-dependent manner
Source: PubMed Central journal article supplement (PMC7791766; doi:10.1186/s40170-020-00236-3), 2021-01-07
Supplement: 40170_2020_236_MOESM1_ESM.pdf [file 40170_2020_236_MOESM1_ESM.pdf]

**Supplementary Table 1:** Oncomine datasets reference list. Log2 median centered ratio of *PCK1* and *PCK2* in different cancers analyzed with Oncomine (<https://www.oncomine.org>; Rhodes *et al.*, 2004). Analysis type: Cancer versus Normal, threshold at  $p=1E-5$  and top gene rank 10%. Missing values for *PCK1* expression were not significant or were not analyzed in given dataset. Reference to original study is listed.

| Tissue of origin        | Log2 median centered ratio |             | Oncomine dataset (reference)                                     |
|-------------------------|----------------------------|-------------|------------------------------------------------------------------|
|                         | <i>PCK2</i>                | <i>PCK1</i> |                                                                  |
| <i>Bladder</i>          | 1.864                      | -           | Sanchez-Carbayo Bladder 2 (Sanchez-Carbayo <i>et al.</i> , 2006) |
| <i>Bladder</i>          | 1.927                      | -           | Dyrskjot Bladder 3 (Dyrskjot <i>et al.</i> , 2004)               |
| <i>Bladder</i>          | 2.101                      | -           | Dyrskjot Bladder 3 (Dyrskjot <i>et al.</i> , 2004)               |
| <i>Bladder</i>          | 3.063                      | -           | Sanchez-Carbayo Bladder 2 (Sanchez-Carbayo <i>et al.</i> , 2006) |
| <i>Blood</i>            | 2.098                      | -           | Pyeon Multi-cancer (Pyeon <i>et al.</i> , 2007)                  |
| <i>Blood</i>            | 1.501                      | -           | Zhan Myeloma 3 (Zhan <i>et al.</i> , 2008)                       |
| <i>Blood</i>            | 1.542                      | -           | Zhan Myeloma 3 (Zhan <i>et al.</i> , 2008)                       |
| <i>Blood</i>            | 1.914                      | -           | Brune Lymphoma (Brune <i>et al.</i> , 2008)                      |
| <i>Blood</i>            | 2.097                      | -           | Brune Lymphoma (Brune <i>et al.</i> , 2008)                      |
| <i>Blood</i>            | 2.641                      | -           | Piccaluga Lymphoma (Piccaluga <i>et al.</i> , 2007)              |
| <i>Blood</i>            | 4.610                      | -           | Andersson Leukemia (Andersson <i>et al.</i> , 2007)              |
| <i>Blood</i>            | 5.489                      | -           | Andersson Leukemia (Andersson <i>et al.</i> , 2007)              |
| <i>Blood</i>            | 5.602                      | -           | Piccaluga Lymphoma (Piccaluga <i>et al.</i> , 2007)              |
| <i>Blood</i>            | -3.378                     | -8.432      | Finak Breast (Finak <i>et al.</i> , 2008)                        |
| <i>Breast</i>           | 1.572                      | -2.608      | Curtis Breast (Curtis <i>et al.</i> , 2012)                      |
| <i>Breast</i>           | 1.618                      | -1.949      | Curtis Breast (Curtis <i>et al.</i> , 2012)                      |
| <i>Breast</i>           | 1.636                      | -           | Curtis Breast (Curtis <i>et al.</i> , 2012)                      |
| <i>Breast</i>           | 1.685                      | -1.893      | Curtis Breast (Curtis <i>et al.</i> , 2012)                      |
| <i>Breast</i>           | 1.704                      | -1.98       | Curtis Breast (Curtis <i>et al.</i> , 2012)                      |
| <i>Breast</i>           | 1.747                      | -1.971      | Curtis Breast (Curtis <i>et al.</i> , 2012)                      |
| <i>Breast</i>           | 1.809                      | -1.982      | Curtis Breast (Curtis <i>et al.</i> , 2012)                      |
| <i>Breast</i>           | 1.884                      | -           | Ma Breast 4 (Ma <i>et al.</i> , 2009)                            |
| <i>Breast</i>           | 2.077                      | -2.043      | Curtis Breast (Curtis <i>et al.</i> , 2012)                      |
| <i>Breast</i>           | 1.572                      | -           | Pyeon Multi-cancer (Pyeon <i>et al.</i> , 2007)                  |
| <i>FRS</i>              | 2.333                      | -           | Biewenga Cervix (Biewenga <i>et al.</i> , 2008)                  |
| <i>FRS</i>              | 3.470                      | -           | Yoshihara Ovarian (Yoshihara <i>et al.</i> , 2009)               |
| <i>Gastrointestinal</i> | -4.035                     | -           | Cho Gastric (Cho <i>et al.</i> , 2011)                           |
| <i>Gastrointestinal</i> | -2.409                     | -           | Chen Gastric (Chen <i>et al.</i> , 2003)                         |
| <i>Gastrointestinal</i> | -2.162                     | -           | Skrzypczak Colorectal 2 (Skrzypczak <i>et al.</i> , 2010)        |
| <i>Gastrointestinal</i> | -2.020                     | -           | Kaiser Colon (Kaiser <i>et al.</i> , 2007)                       |

|                         |        |        |                                                          |
|-------------------------|--------|--------|----------------------------------------------------------|
| <i>Gastrointestinal</i> | -1.741 | -      | Kaiser Colon (Kaiser <i>et al</i> , 2007)                |
| <i>Gastrointestinal</i> | -1.736 | -      | Kaiser Colon (Kaiser <i>et al</i> , 2007)                |
| <i>Gastrointestinal</i> | -1.730 | -11.78 | Gaedcke Colorectal (Gaedcke <i>et al</i> , 2010)         |
| <i>Gastrointestinal</i> | -1.647 | -      | Kaiser Colon (Kaiser <i>et al</i> , 2007)                |
| <i>Gastrointestinal</i> | -1.576 | -10.11 | Skrzypczak Colorectal 2 (Skrzypczak <i>et al</i> , 2010) |
| <i>Gastrointestinal</i> | -1.546 | -6.755 | Skrzypczak Colorectal 2 (Skrzypczak <i>et al</i> , 2010) |
| <i>Gastrointestinal</i> | -1.501 | -5.458 | Kaiser Colon (Kaiser <i>et al</i> , 2007)                |
| <i>Heptocellular</i>    | -2.862 | -5.15  | Chen Liver (Zhou <i>et al</i> , 2002)                    |
| <i>Heptocellular</i>    | -2.862 | -10.35 | Roessler Liver (Roessler <i>et al</i> , 2010)            |
| <i>Hepatocellular</i>   | -3.400 | -7.603 | Roessler Liver (Roessler <i>et al</i> , 2010)            |
| <i>Liposarcoma</i>      | -3.191 | -      | Barretina Sarcoma (Barretina <i>et al</i> , 2010)        |
| <i>Liposarcoma</i>      | -2.817 | -      | Barretina Sarcoma (Barretina <i>et al</i> , 2010)        |
| <i>Renal</i>            | -10.41 | -14.78 | Beroukhim Renal (Beroukhim <i>et al</i> , 2009)          |
| <i>Renal</i>            | -9.677 | -23.35 | Beroukhim Renal (Beroukhim <i>et al</i> , 2009)          |
| <i>Renal</i>            | -8.552 | -      | Lenburg Renal (Lenburg <i>et al</i> , 2003)              |
| <i>Renal</i>            | -7.623 | -      | Gumz Renal (Gumz <i>et al</i> , 2007)                    |
| <i>Renal</i>            | -4.330 | -      | Jones Renal (Jones <i>et al</i> , 2005)                  |
| <i>Renal</i>            | -3.547 | -8.938 | Jones Renal (Jones <i>et al</i> , 2005)                  |
| <i>Renal</i>            | -3.474 | -18.9  | Jones Renal (Jones <i>et al</i> , 2005)                  |
